# Supplementary material for: Altered Glycolysis, Mitochondrial Biogenesis, Autophagy and Apoptosis in Peritoneal Endometriosis in Adolescents
Source: MDPI journal article supplement (doi:10.3390/ijms25084238), 2024-04-11
Supplement: s1 [file s1]

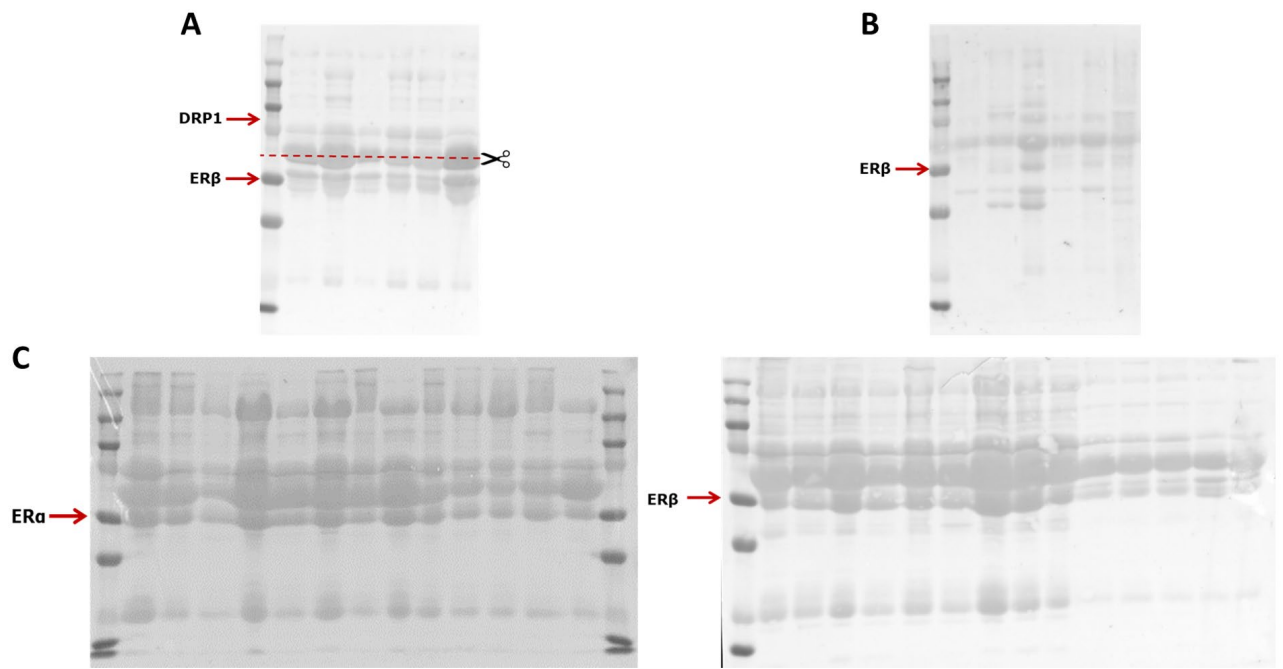

Figure S.1. Ponceau staining images for ER $\beta$  levels in exosomes from blood (A), peritoneal fluid (B) and ER $\alpha$  and ER $\beta$  levels in tissues (C).

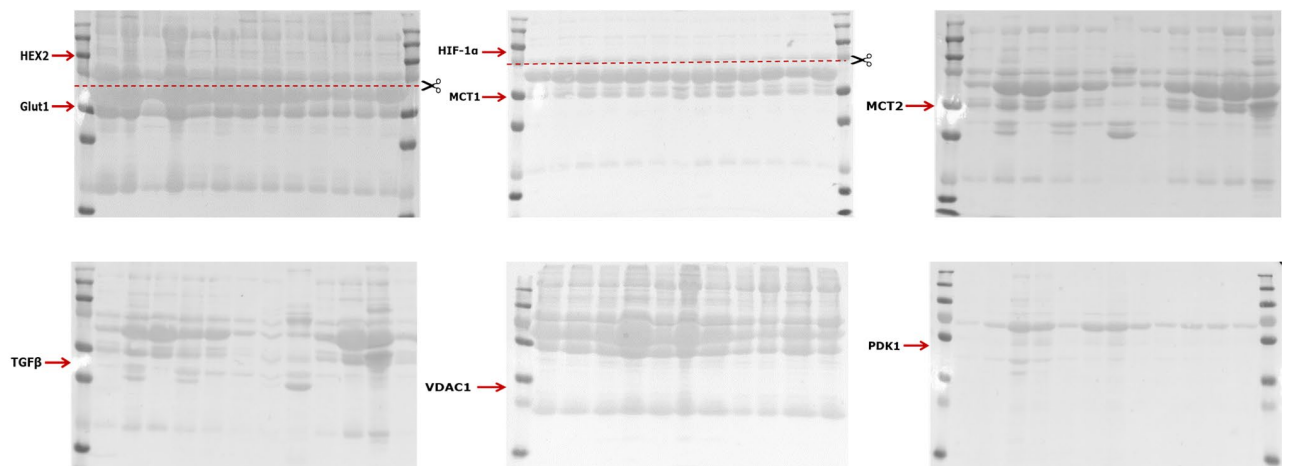

Figure S.2. Ponceau staining images for Glut1, Hex2, Hif-1 $\alpha$ , MCT1, MCT2, TGF $\beta$ , VDAC1, PDK1 markers in tissue biopsies.

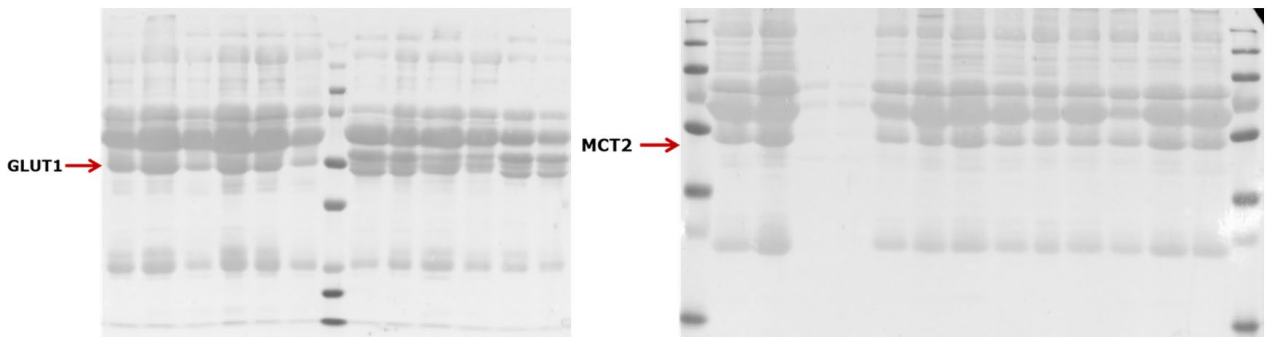

Figure S.3. Ponceau staining images for Glut1 and MCT2 in blood exosomes.

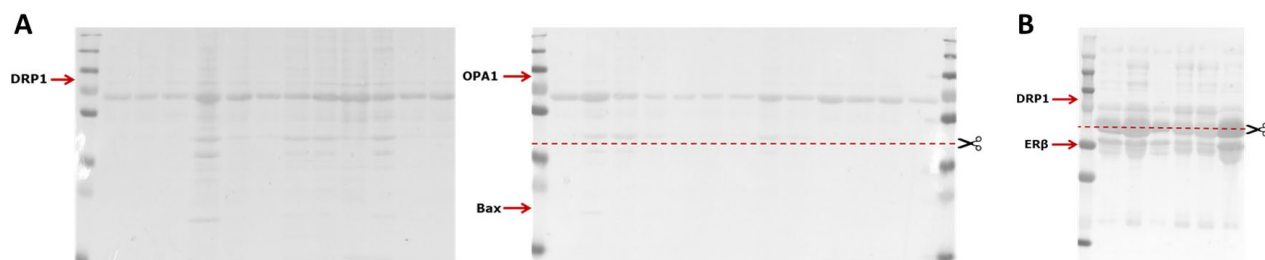

Figure S.4. Ponceau staining images for DRP1, OPA1 levels in tissues (A) and DRP1 level in blood exosomes (B).

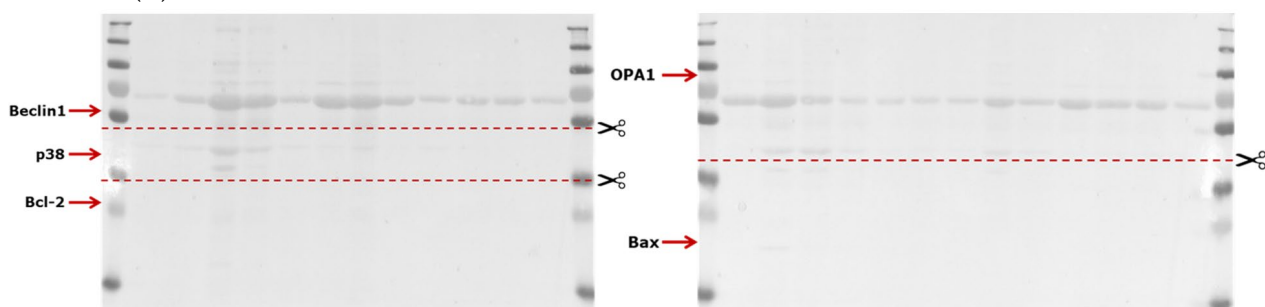

Figure S.5. Ponceau staining images for Bcl-2, p38, Becklin1 (A) and Bax, Opa1 (B) levels in tissues.

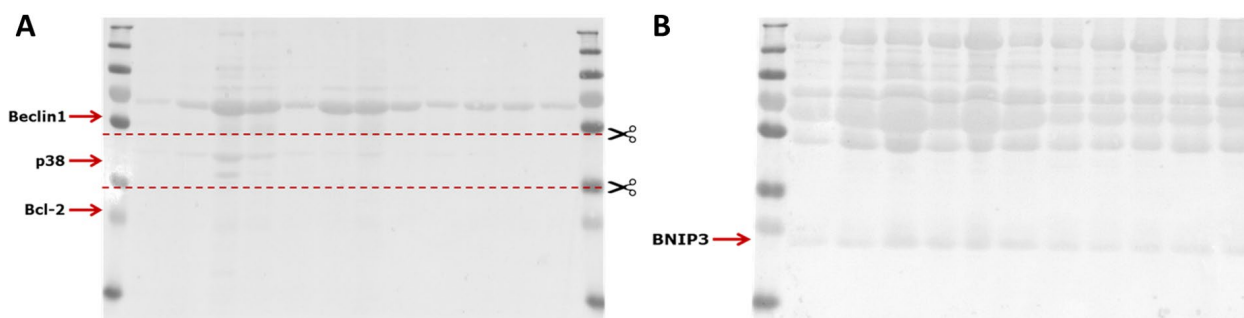

Figure S.6. Ponceau staining image for p38 and Becklin1 levels in tissues (A) and BNIP3 level in blood exosomes (B).

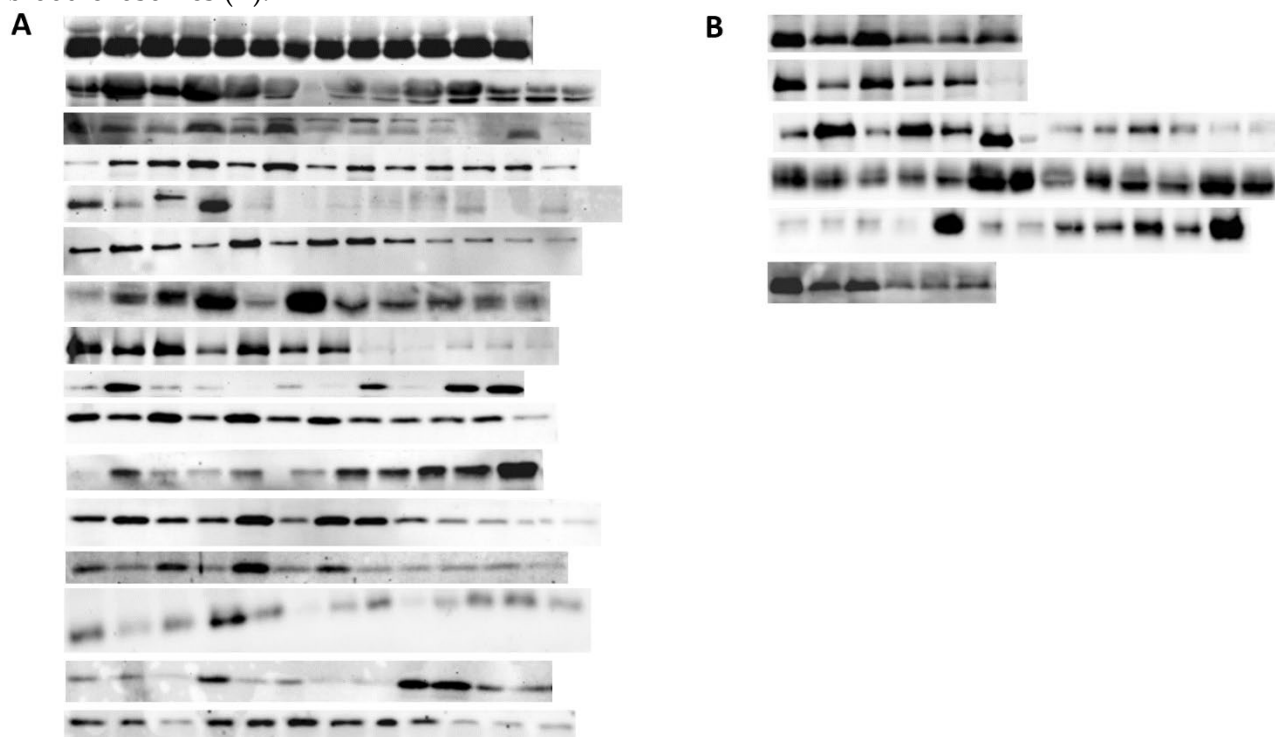

Figure S. 7. Original images obtained by Western blot for tissues (A) and exosomes (B). For description see Figures 1-6.
